# Supplementary material
Source: Springer Nature journal article supplement (https://www.springermedizin.de/resource/supplementary/12936_2012_2520_MOESM4_ESM.pdf/9543080)

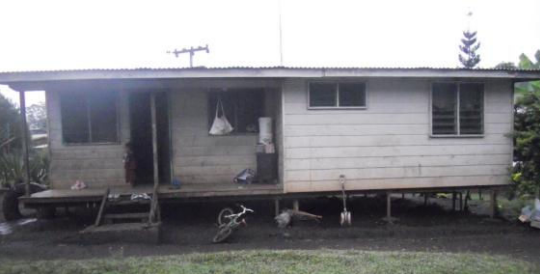

Supplement: MOESM4 [file 9543080]
